# Supplementary material
Source: PubMed Central journal article supplement (PMC9974823)

# Supplemental Figure 1

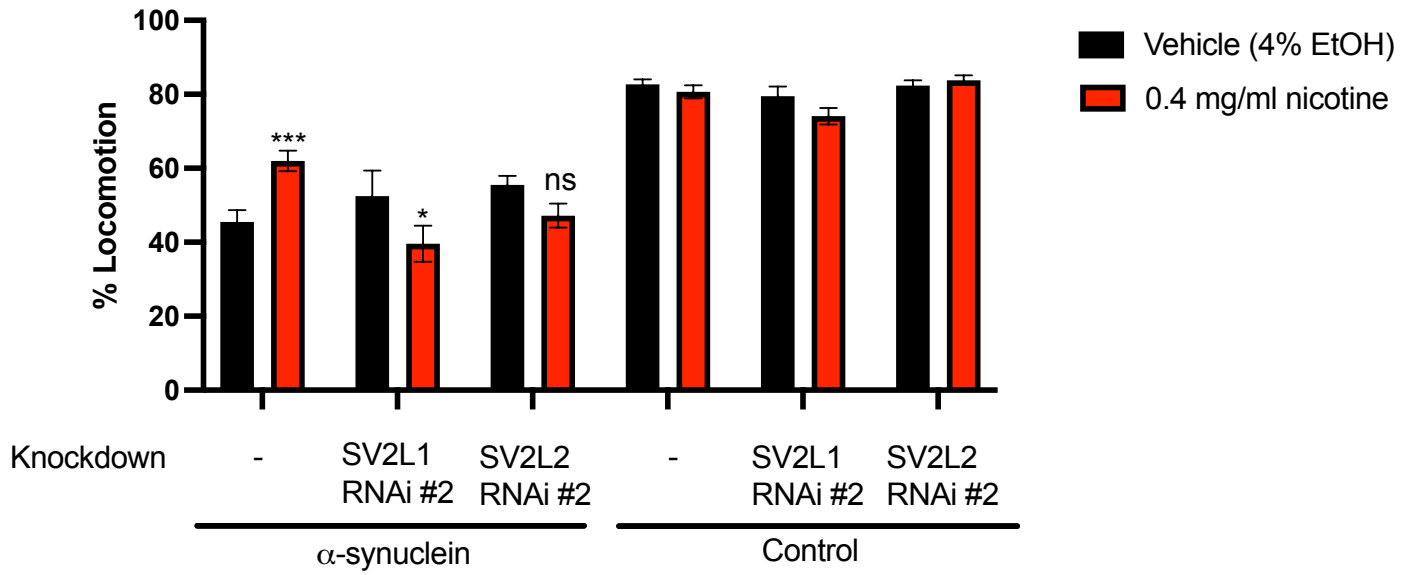

# Supplemental Figure 2

A. SV2L1 knockdown

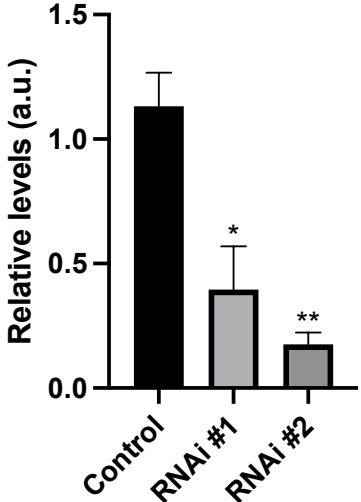

B. SV2L2 knockdown

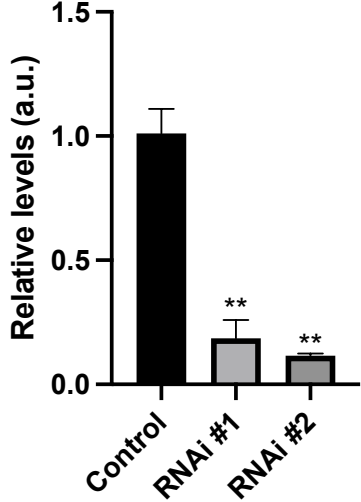

# Supplemental Figure 3

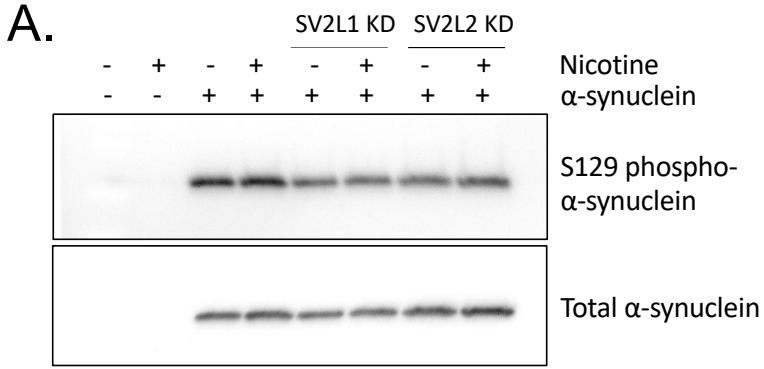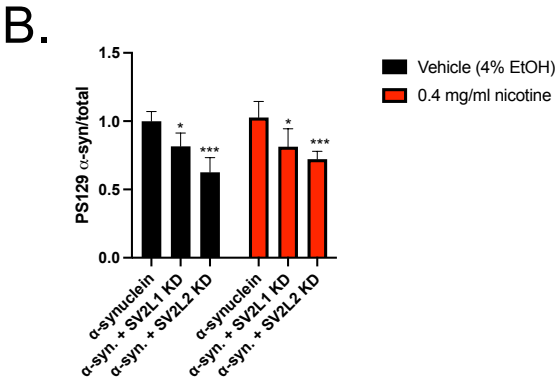

# Supplemental Figure 4

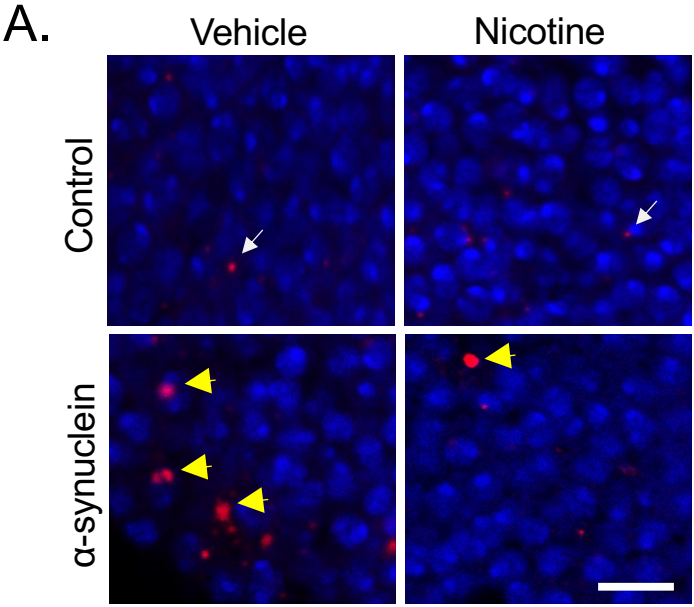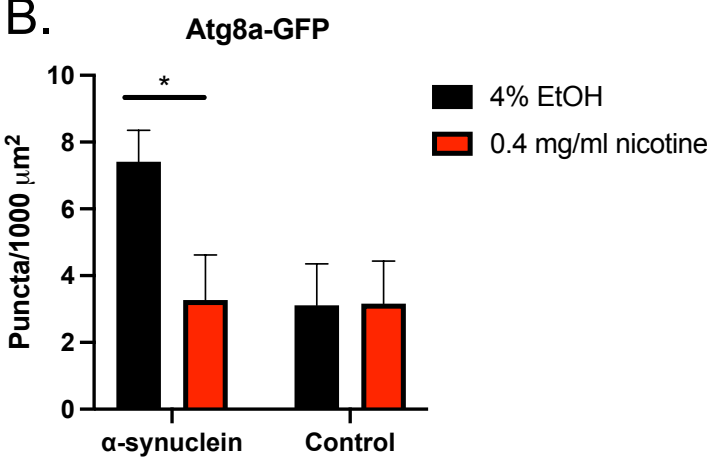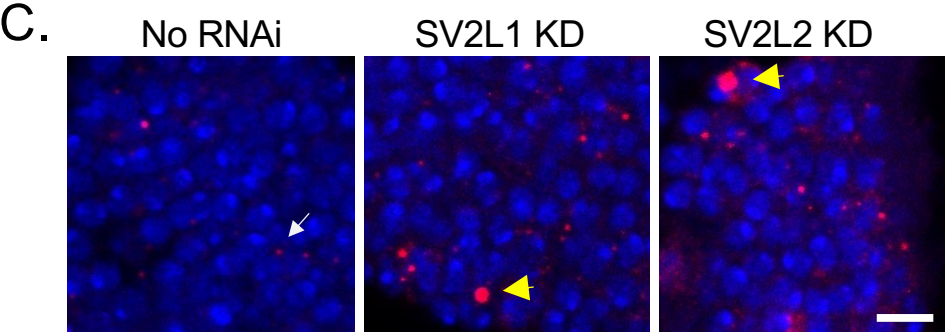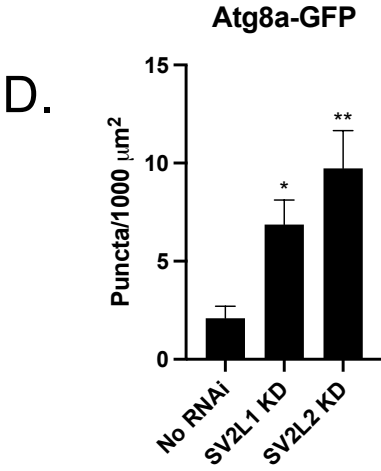

Supplement: NIHMS1849570-supplement-supinfo.pdf [file NIHMS1849570-supplement-supinfo.pdf]
